# Supplementary material for: Microphysics of Inelastic Deformation in Reservoir Sandstones from the Seismogenic Center of the Groningen Gas Field
Source: Springer Nature journal article supplement (doi:10.1007/s00603-020-02215-y), 2020-08-14
Supplement: MOESM1 [file 18284656]

Supporting Information to the research article:

Microphysics of inelastic deformation in reservoir sandstones from the  
seismogenic center of the Groningen gas field

R.P.J. Pijenburg and C.J. Spiers

*Journal of the Mechanics and Physics of Solids*

**Content:**

Figures S1 and S2

**Introduction:**

This file contains two pieces of supporting information. In Figure S1, we illustrate the porosity versus normal stress data implied by the void ratio versus normal stress data reported by [Brown *et al.*, 2017], plus the data treatment employed to obtain the clay consolidation behavior described by Equation 7 of the main text. In Figure S2 we provide additional geometrical insights for the estimation of the strain increment due to multi-edge cracking, as described in Section 7.5.2 of the main text.

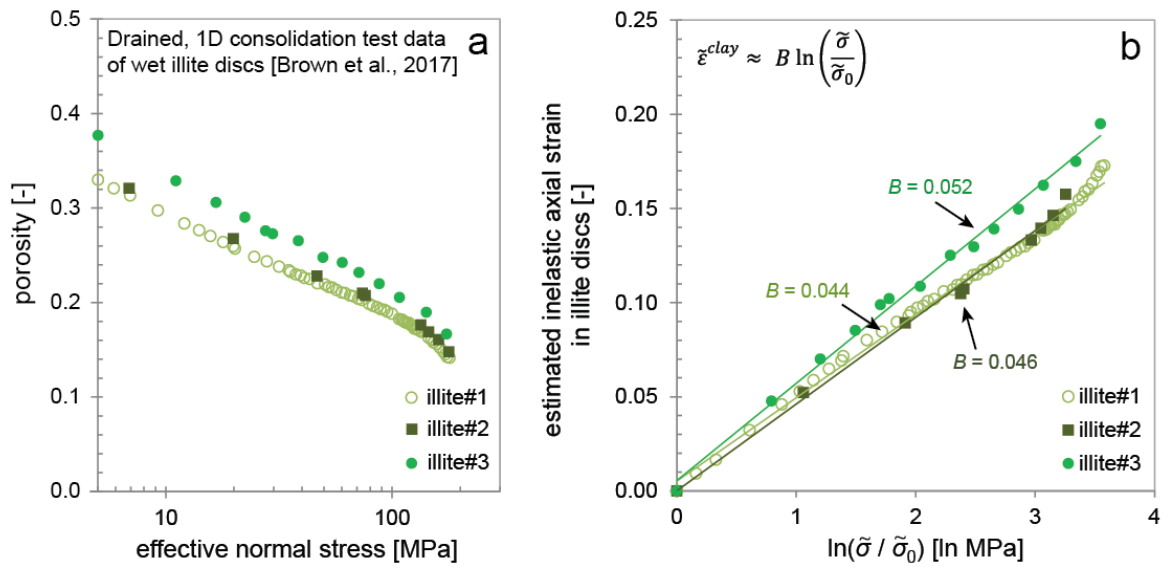

**Figure S1a)** Plot showing the porosity ( $\phi$ ) evolution of wet illite discs (1-2 mL) with increasing effective axial stress ( $\sigma$ ), calculated from the void ratio ( $= \phi/[1 - \phi]$ ) versus  $\sigma$  data obtained in the drained, 1-D consolidation tests performed by *Brown et al.*, [2017]; **b)** After subtraction of the expected elastic component (see text), the estimated 1-D, inelastic porosity reduction, or inelastic axial strain of the illite films (in our model denoted:  $\tilde{\epsilon}^{clay}$ ) can be described by a log-linear relation, as shown. In our model, the illite films are present on grain contacts, whereby  $\sigma$  is given by the effective contact normal stress ( $\tilde{\sigma}$ ) and  $\tilde{\sigma}_0$  is an initial, reference contact effective normal stress.

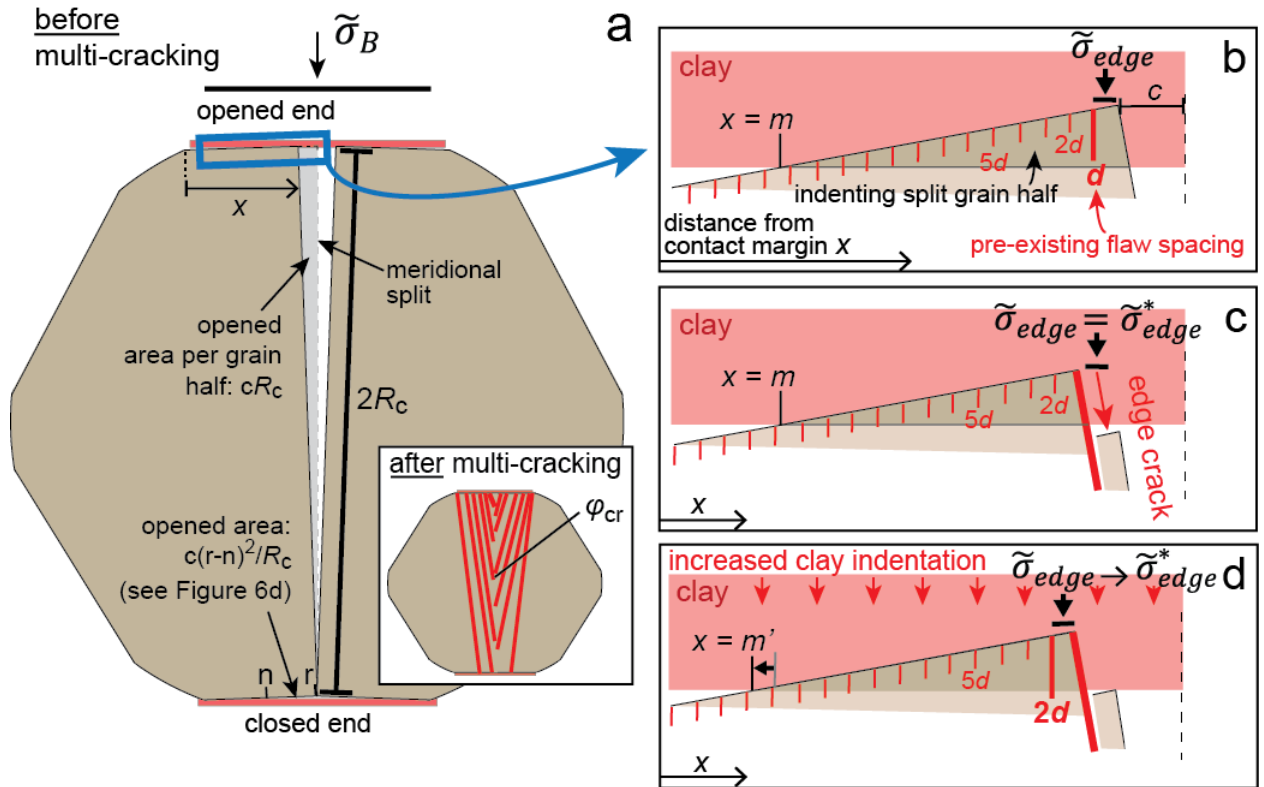

**Figure S2:** Diagrams illustrating the geometry and geometrical parameters considered in our analysis of intragranular, multi-edge cracking, following initial meridional splitting at assumed constant grain contact stress  $\tilde{\sigma}_B$  during deviatoric compression at  $\theta = 0^\circ$ . **a)** After splitting, the cross-sectional area of the opened gap is the sum of the opened cross-sectional area of the split, plus that at the closed end of the crack, along  $n > x \geq r$  (refer Figure 6d). **b)** Detailed view on one side of the split grain contact, at the opened end. Along this contact, pre-existing flaws are assumed present at a regular distance  $d$ . The normal stress ( $\tilde{\sigma}_{edge}$ ) acting on the most uplifted edge within one flaw spacing ( $d$ ) of the initial meridional crack will be strongly enhanced due to clay indentation and will tend to extend the first neighboring contact flaws to produce an edge crack. **c)** When  $\tilde{\sigma}_{edge}$  equals the critical value  $\tilde{\sigma}_{edge}^*$  for edge crack propagation, two slices alongside the meridional split will break off, be displaced into the gap opened by the split, and cease to support load; **d)** At assumed constant applied stress, the reduction in supported load causes the grain halves to indent further into the clay, leading to again enhanced loading of the next edge, between  $(r - 2d) > x \geq (r - d)$ , which then instantly reaches  $\tilde{\sigma}_{edge}^*$ . At constant stress, this unstable sequence of clay-indentation and breaking off slices progresses until the opened gap is filled such that the broken-off slices start to support load.
